# Supplementary material for: The Influence of Arabinoxylans on the Properties of Wheat Bread Baked Using the Postponed Baking Method
Source: MDPI journal article supplement (doi:10.3390/molecules29040904), 2024-02-18
Supplement: s1 [file s1]

## Supplementary material

**Table S1.** The amounts of ingredients used for dough preparation from 100 g of flour.

| AX<br>preparation* | Share of AX<br>[%] | Share of AX<br>[g] | Share of flour<br>[g] | Share of yeast<br>[g] | Share of salt<br>[g] |
|--------------------|--------------------|--------------------|-----------------------|-----------------------|----------------------|
| Control            | 0                  | 0                  | 100                   | 3.5                   | 1.8                  |
| AX_NM              | 1                  | 1                  | 99                    | 3.5                   | 1.8                  |
| AX_NM              | 2                  | 2                  | 98                    | 3.5                   | 1.8                  |
| AX_HYD             | 1                  | 1                  | 99                    | 3.5                   | 1.8                  |
| AX_HYD             | 2                  | 2                  | 98                    | 3.5                   | 1.8                  |
| AX_CR              | 1                  | 1                  | 99                    | 3.5                   | 1.8                  |
| AX_CR              | 2                  | 2                  | 98                    | 3.5                   | 1.8                  |

\*Control- wheat bread without AX; AX\_NM- wheat bread with non-modified AX; AX\_HYD- wheat bread with hydrolyzed AX; AX\_CR-wheat bread with cross-linked AX.
